CORRECTION

# Correction: Influences of atmospherics on customer satisfaction and behavioural intentions in the restaurant industry: Evidence from an emerging economy

Mananage Shanika Hansini Rathnasiri, Pawan Kumar, Bindu Aggarwal, Kiran Nair, Narayanage Jayantha Dewasiri

There is an error in affiliation 3 for author Bindu Aggarwal. The correct affiliation 3 is: University School of Business Chandigarh University, Mohali-140413, Punjab, India.

## Reference

1. Rathnasiri MSH, Kumar P, Aggarwal B, Nair K, Dewasiri NJ. Influences of atmospherics on customer satisfaction and behavioural intentions in the restaurant industry: evidence from an emerging economy. PLoS One. 2025;20(4):e0319948. <https://doi.org/10.1371/journal.pone.0319948> PMID: [40184398](https://pubmed.ncbi.nlm.nih.gov/40184398/)

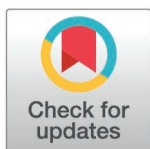

## OPEN ACCESS

**Citation:** Rathnasiri MSH, Kumar P, Aggarwal B, Nair K, Dewasiri NJ (2025) Correction: Influences of atmospherics on customer satisfaction and behavioural intentions in the restaurant industry: Evidence from an emerging economy. PLoS One 20(5): e0324038. <https://doi.org/10.1371/journal.pone.0324038>

**Published:** May 23, 2025

**Copyright:** © 2025 Rathnasiri et al. This is an open access article distributed under the terms of the [Creative Commons Attribution License](https://creativecommons.org/licenses/by/4.0/), which permits unrestricted use, distribution, and reproduction in any medium, provided the original author and source are credited.
